# Supplementary figures and images for: Improvements in Gut Microbiome Composition Predict the Clinical Efficacy of a Novel Synbiotics Formula in Children with Mild to Moderate Atopic Dermatitis
Source: MDPI journal article supplement (doi:10.3390/microorganisms11092175), 2023-08-28

Figure S1

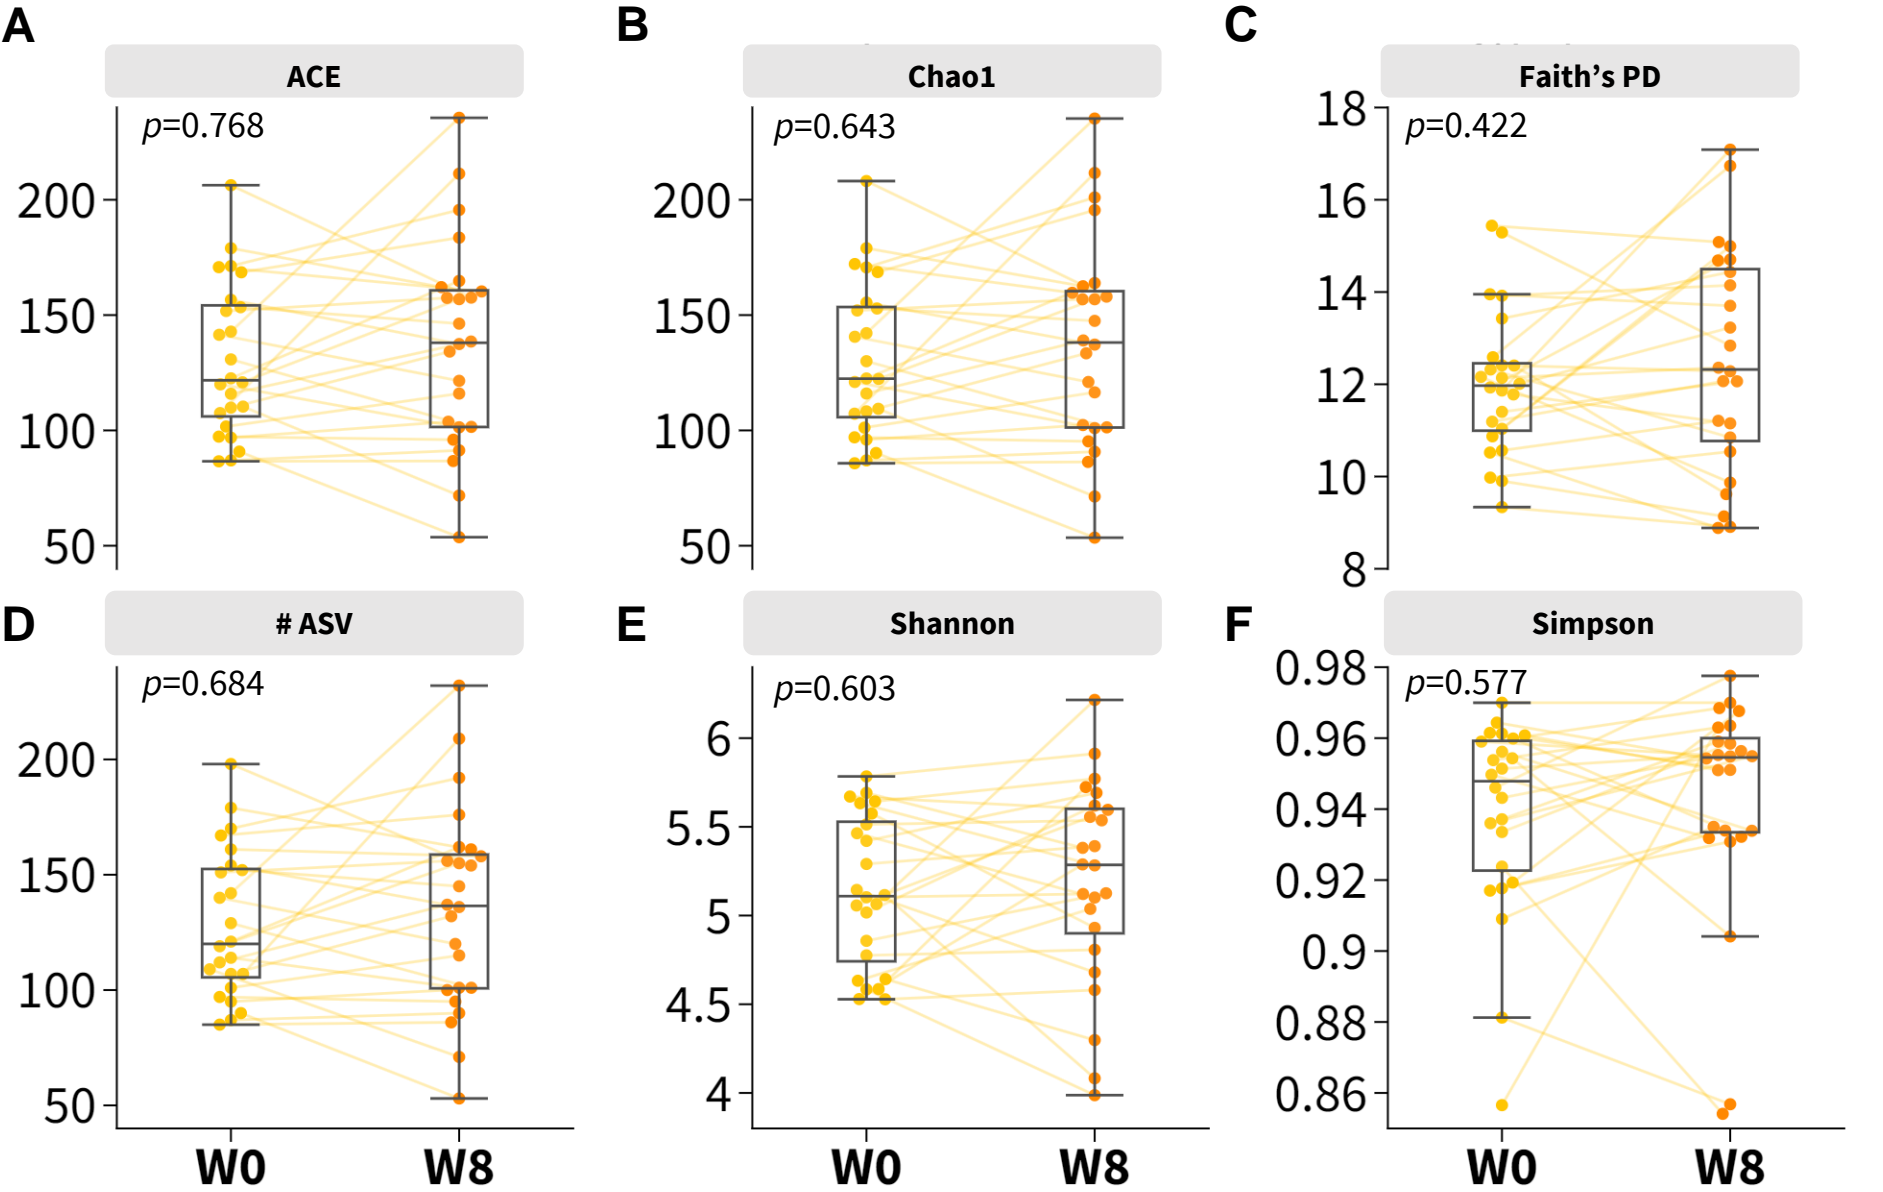

Figure S2

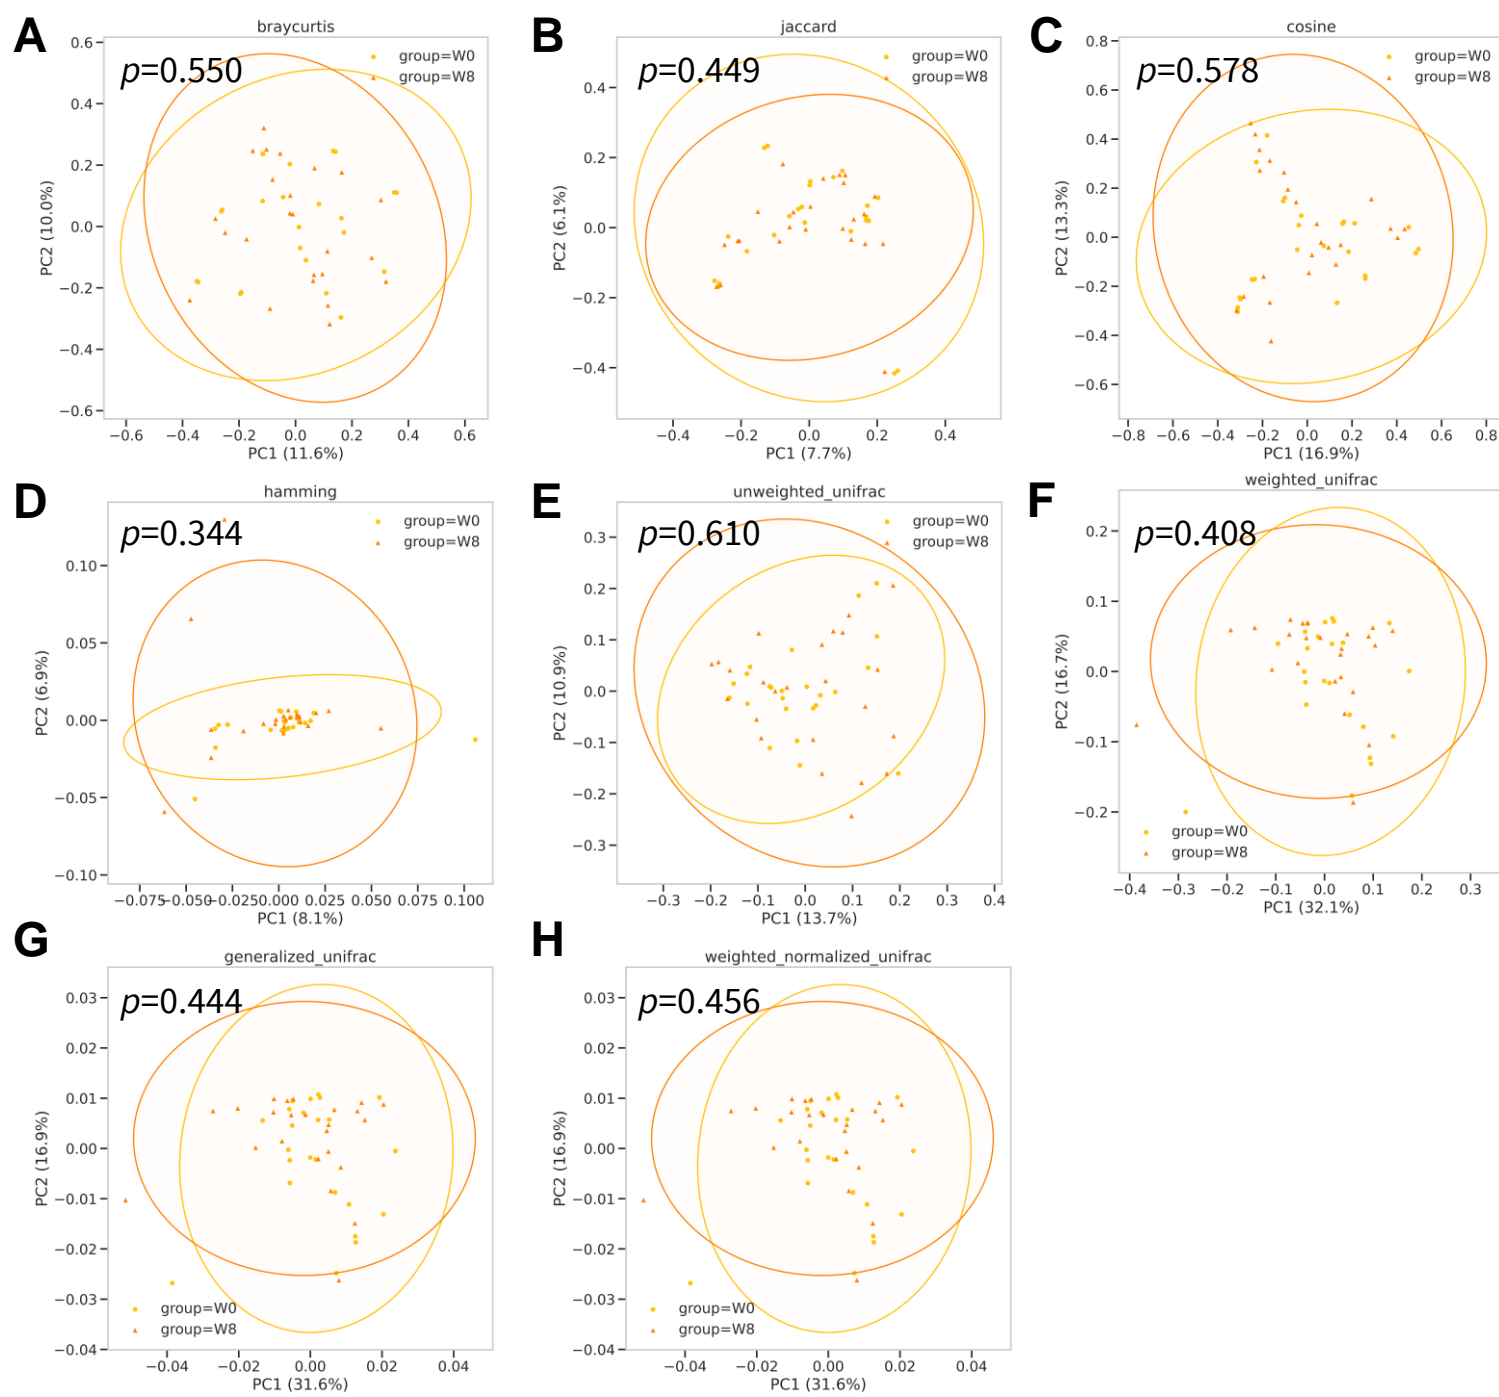

Figure S3

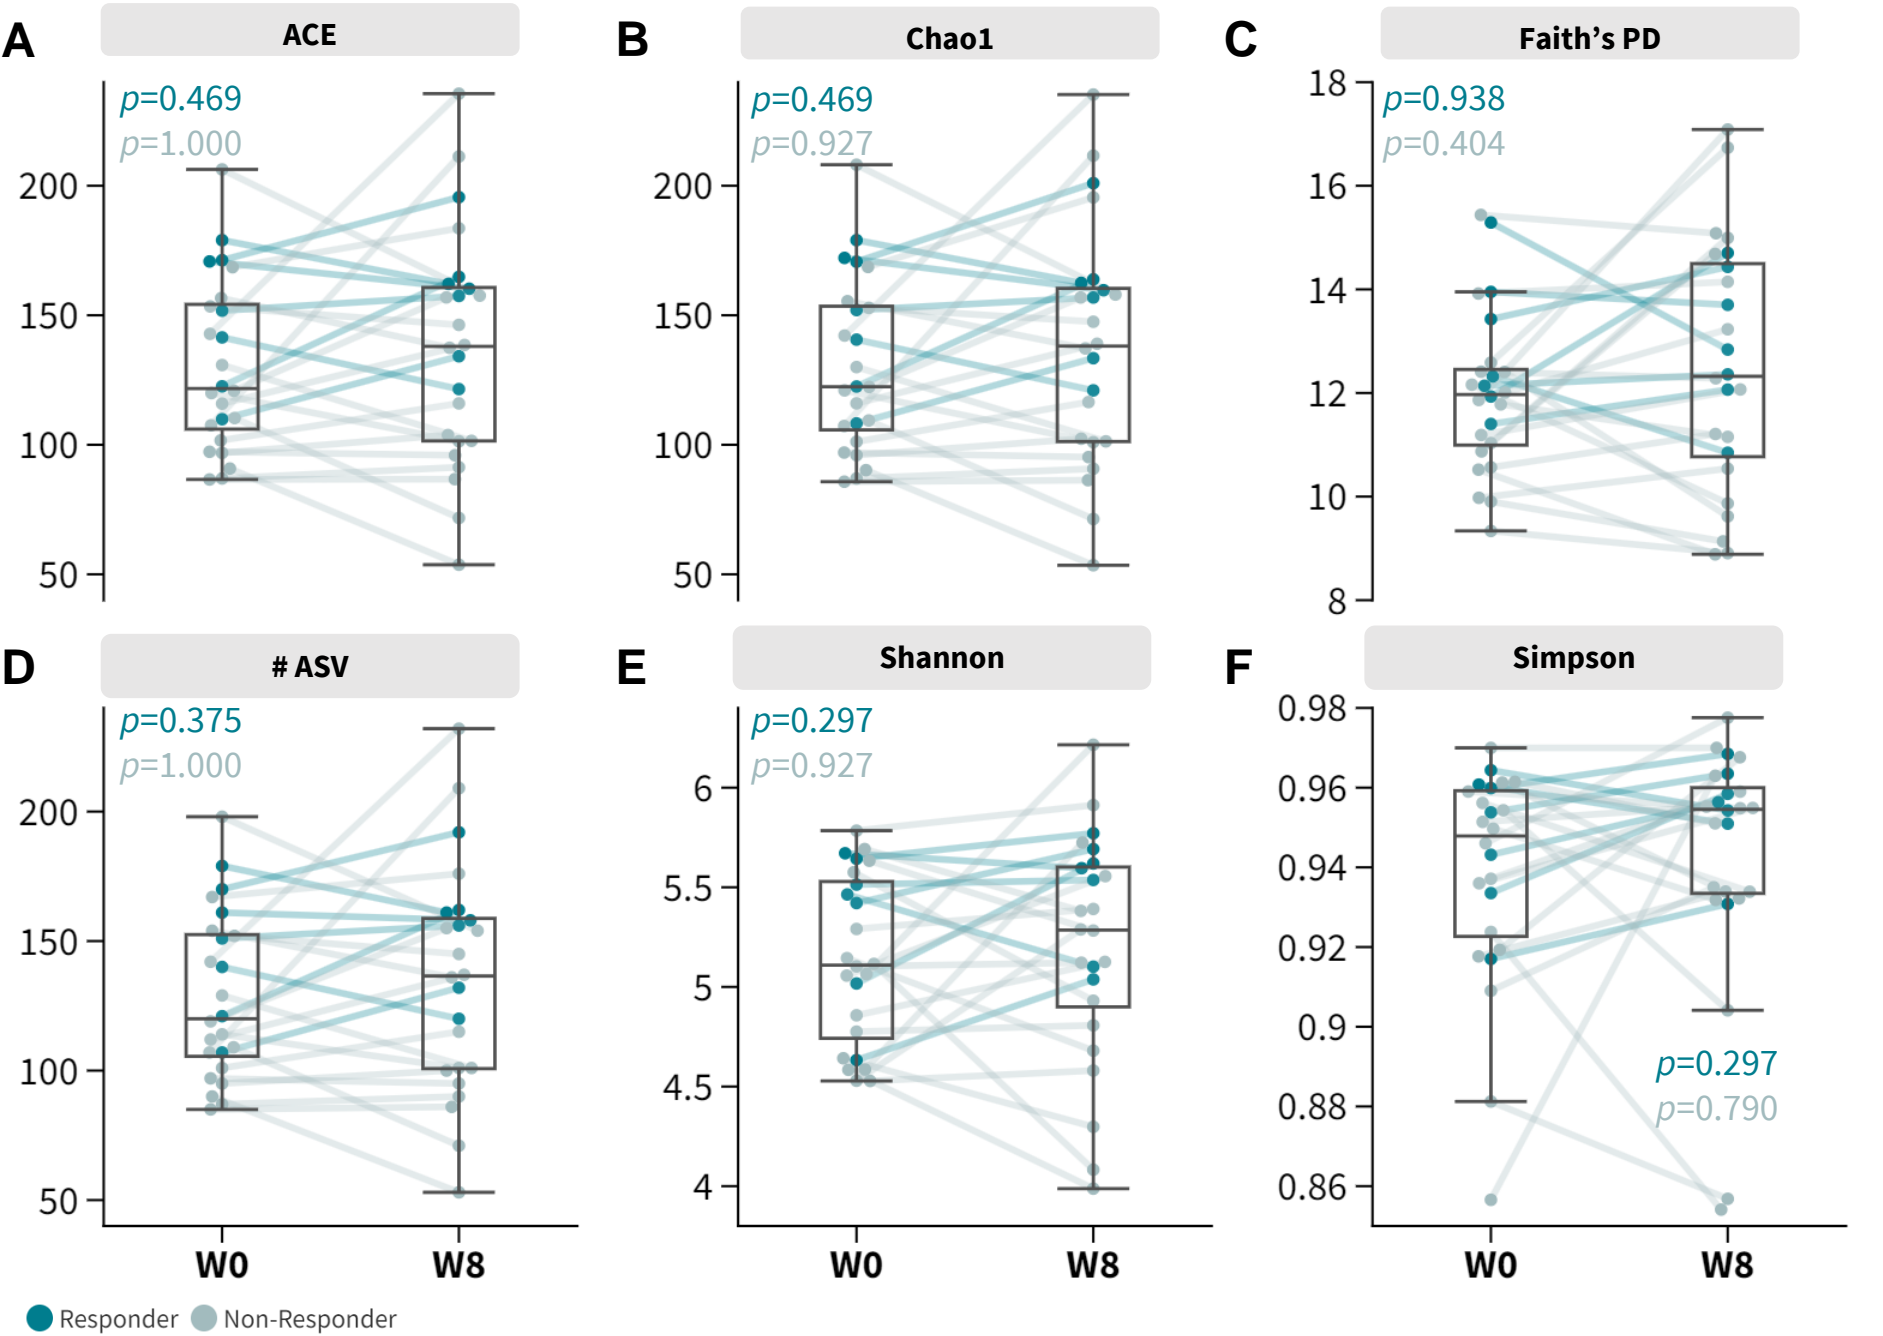

Figure S4

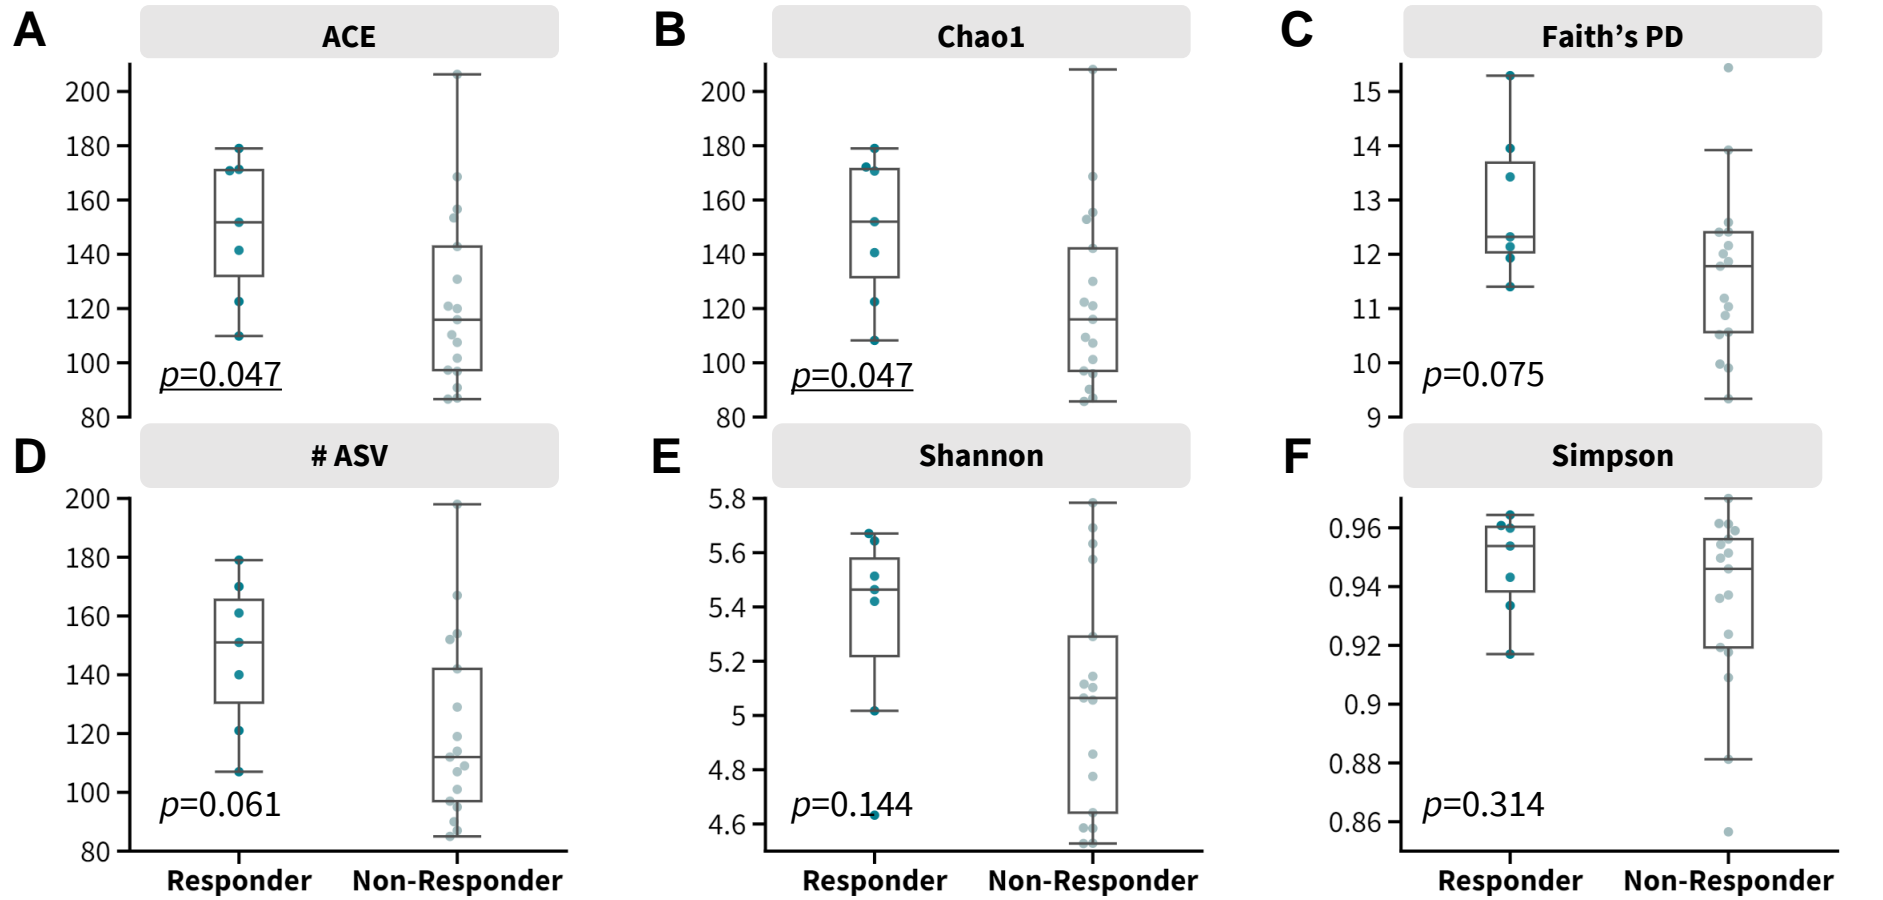

Figure S5

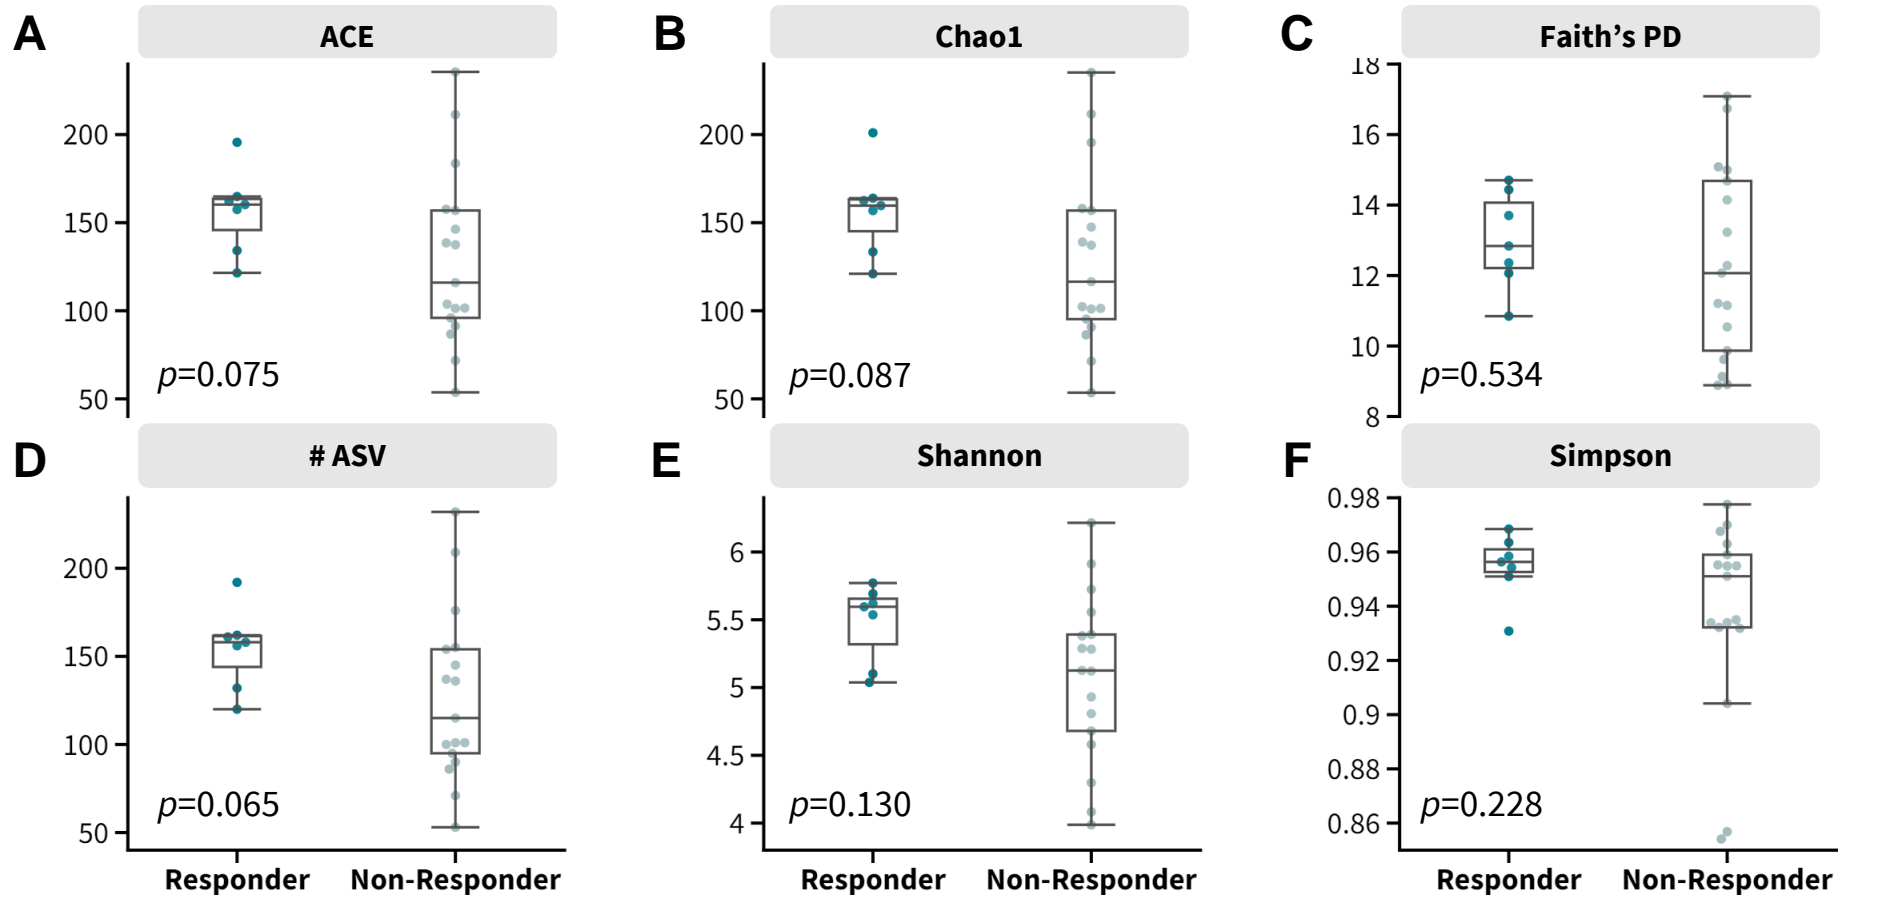

Figure S6

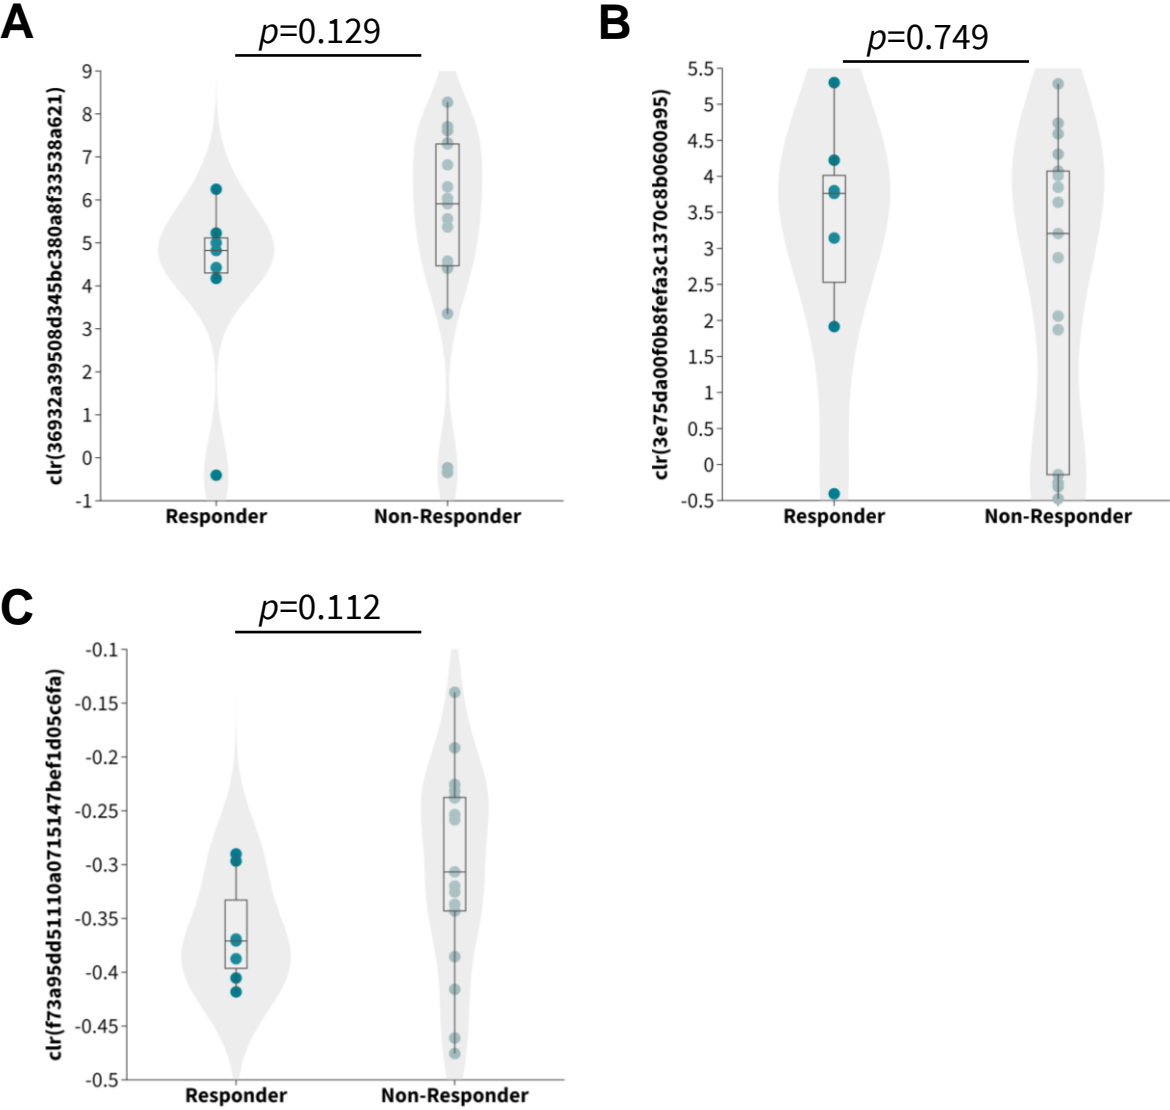

Figure S7

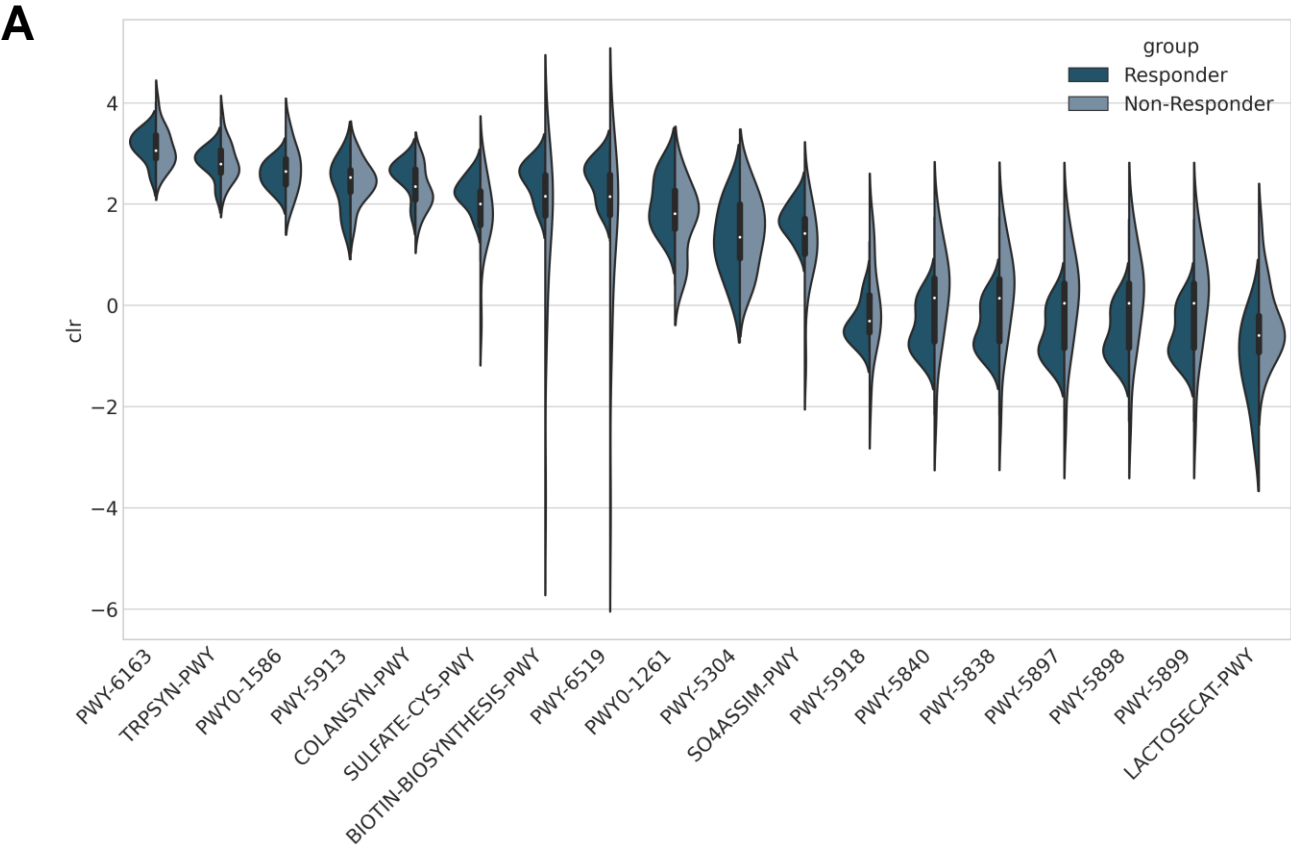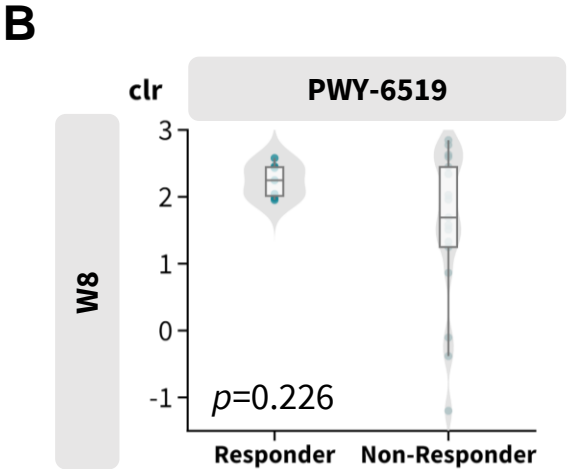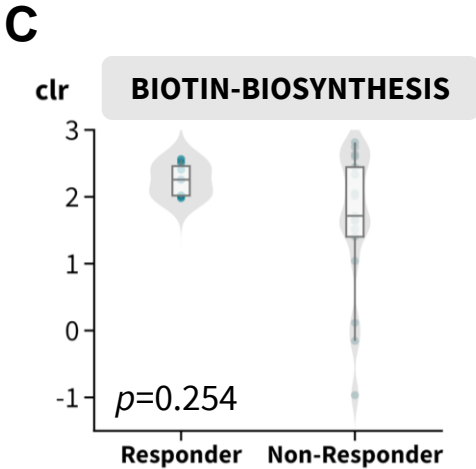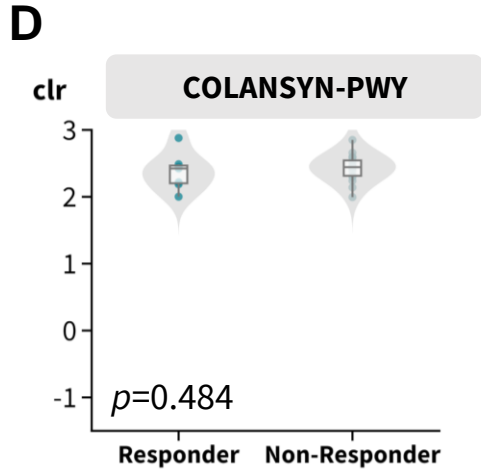

Supplement: s1 [file s1]
